# **NMDAR-independent acetylcholine, serotonin, and norepinephrine mediated modulation of synaptic eligibility traces into LTD in mice visual cortex**

Shumsuzzaman Khan<sup>1,2\*</sup>

*<sup>1</sup>Department of Neuroscience, Johns Hopkins University, Baltimore, Maryland, USA.*

\*Correspondence: Shumsuzzaman Khan. Email: p53p35dna@yahoo.com; Tel.: +14435384402.

<sup>2</sup>Present addresses: Department of Mechanical Engineering, Division of Regenerative Neural Engineering, University of North Carolina, Charlotte, North Carolina- 28223-0001, USA.

## **Abstract**

This manuscript has been withdrawn after a formal notification from Johns Hopkins University that it was submitted and made public without the appropriate approval
